# Supplementary material
Source: Research Square preprint supplement (doi:10.21203/rs.3.rs-8494965/v1)
Supplement: Supplementary file 1 [file b7c14b00f5af4c3ba5db2f80.docx]

Table 1: Contribution of different factors to black carbon; a comparison of aethalometer model and PMF results during Punjab campaign.

| **Punjab campaign**  **(27th October – 18th November 2023)** | | | | | |
| --- | --- | --- | --- | --- | --- |
|  | **BCbb**  % and (mean conc. ± std.) µg/m3 | **BCff**  % and (mean conc. ± std.) µg/m3 | | **BCMiscellaneous**  % and (mean conc. ± std.) µg/m3 | |
| **Aethalometer**  **model** | 48.5%  (6.22 ± 4.64) | 51.5%  (6.59 ± 2.76) | | N/A | |
| **PMF model** | BCBB  (5.40 ± 5.27) | BCVE  (2.30 ± 1.95) | BCPP  (2.72 ± 0.97) | BCWI  (0.23 ± 0.29) | BCPb-rich  (0.70 ± 1.45) |
| 47.7% | 20.2% | 24% | 2% | 6.1% |
