# Supplementary material
Source: Research Square preprint supplement (doi:10.21203/rs.3.rs-8494965/v1)
Supplement: Supplementary file 2 [file b9e00ffe09a27f7657b145d0.docx]

**Supplementary Information for “Ambient black carbon and its dependence on in-situ stubble burning”**

Vikas Goela,b,1, Ajit Kumara,1, Anjanay Pandeyb, Mohd Faisalb,d, Umer Alib, Rakesh Maitya, Ravindra Khaiwale, Suman Morf, Vikram Singhb*, Mayank Kumara*

aDepartment of Mechanical Engineering, Indian Institute of Technology Delhi, New Delhi, 110016, India

bDepartment of Civil and Environmental Engineering, Virginia Tech, Blacksburg, 24060, USA.

cDepartment of Chemical Engineering, Indian Institute of Technology Delhi, New Delhi, 110016, India

dLaboratory of Atmospheric Chemistry, Paul Scherrer Institute, Villegen, Aargau, 5232, Switzerland

eDepartment of Community Medicine and School of Public Health, PGIMER, Chandigarh 160012, India

fDepartment of Environment Studies, Panjab University, Chandigarh 160014, India

**1**Vikas Goel and Ajit Kumar contributed equally as joint first authors.

*Corresponding authors.

E-mail addresses: kmayank@mech.iitd.ac.in (Mayank Kumar); vs225@chemical.iitd.ac.in (Vikram Singh)

**S1. Quality Assurance and Quality Control (QA/QC) Procedures**

The Xact 625i monitored ambient PM2.5 metals at 16.7 L/min with hourly resolution, performing automated QA checks for Cr, Cd, and Pb at midnight, along with regular maintenance (leak, flow rate, XRF, and calibration) as per manufacturer guidelines. The Aethalometer operated at 5 L/min, recording data at 1-minute intervals (averaged hourly), with routine maintenance, including flow verification, optical chamber cleaning, and insect screen upkeep. Data were monitored for anomalies in BC attenuation. These instruments measured elemental composition and BC in PM2.5, not total mass concentration.

**S2. Positive Matrix Factorization (PMF)**

**S2.1 PMF Input Data Processing**

The elemental species measured by the Xact 625i, along with black carbon (BC) measured by the Aethalometer AE33, were analyzed using a coupled Positive Matrix Factorization (PMF)-based source apportionment approach. While the Xact 625i instrument was set to measure elements at half an hourly time resolution, the Aethalometer measured BC at a 1minute interval; these elements and BC data were subsequently averaged to an hourly resolution to align with the Xact 625i measurements for consistency in the coupled PMF analysis.

To ensure data quality and improve model performance, certain elemental species from the Xact 625i were excluded from the PMF input if a substantial fraction of data points (exceeding 50%) fell below their respective Minimum detection limits (MDL) (Polissar et al., 1998). The MDL values for the elemental species were provided by the manufacturer (Cooper Environmental), whereas the MDL for BC was determined following the methodology outlined by (J. E. Petit et al., 2014).

***S2.2 Species Selection, Classification and Reweighting***

Xact 625i was set up to quantify 36 elements (Si, S, Cl, K, Ca, Sc, Ti, V, Mn, Fe, Co, Zn, Ga, Ge, As, Se, Br, Rb, Sr, Mo, Pd, Ag, Cd, In, Sn, Sb, Te, Cs, Ba, La, Ce, Au, Hg, Tl, Pb, and Bi) with half-hourly time resolution. During this study, 21 elements (Sc, V, Co, Ga, Ge, Mo, Pd, Ag, Cd, Sr, In, Sn, Sb, Te, Cs, La, Ce, Au, Hg, Tl, Bi) were excluded as more than 50% of their data points were below the MDL. The measurement uncertainty reported by Xact 625i software, which accounts for spectral deconvolution and sampling uncertainty (Tremper et al., 2018), was used for the PMF input.

The reliability of the measured concentrations for each species j was further assessed using the signal-to-noise (S/N) ratio, calculated within the EPA PMF 5.0 module (Norris et al., 2014). For each concentration value xij and its corresponding uncertainty sij, the signal dij​ was defined as the difference between the two, such that

species if (1)

if (2)

(S/N) ratio is then given by Equation 3 as follows:

(3)

As the first step in data preprocessing, species were categorized based on their signal-to-noise (S/N) ratios.

- Species with S/N > 1 were classified as strong, and their input concentrations and uncertainties were used without modification.
- Species with S/N between 0.5 and 1 were categorized as weak, and their uncertainty values were increased by a factor of four while retaining the original input concentrations.
- Species with an S/N ratio below 0.5 were classified as bad and excluded from further analysis.

After performing the signal-to-noise (S/N) ratio check, we proceed to the analysis of the observed versus predicted time series. In this step, we identify potential outliers by examining the alignment of peaks between the observed and predicted time series. If significant discrepancies are observed in peak alignment, these points are flagged as potential outliers. Additionally, we analyze the histogram of scaled residuals to assess the distribution of errors. Outliers are identified based on the scaled residuals, where values falling outside the range of -3 to 3 indicate unusually large deviations from the expected model behaviour. Data points classified as outliers are excluded from further analysis, as they may introduce bias or distort the overall model performance. After the PMF run, the coefficient of determination (R²) between the measured and predicted time series of each species was evaluated, excluding outliers. If a species exhibited poor prediction performance (low R²), it was further downweighted to improve model accuracy. The coefficient of determination for each species, as provided by the EPA PMF model, is shown in Table S3. The scatter plot between measured BC and reconstructed BC is shown in Figure S3.

***S2.3 Coupled PMF***

As discussed in Section 5 of the main manuscript, this study builds upon the work of Petit et al. (2014), which originally introduced the coupled PMF methodology, and Kumar et al. (2024) implemented coupled PMF for black carbon (BC) source apportionment. In this study, we integrated elemental composition data with black carbon concentrations to perform coupled PMF analysis. Similar to the elemental PMF approach, the uncertainty associated with elemental measurements is taken as the reported instrument uncertainty, and values below the method detection limit (MDL) are treated consistently with the elemental-only PMF approach. The MDL for black carbon is adopted from Petit et al. (2014), as the same instrumentation was utilized in both studies. The uncertainties and below-MDL values for BC were determined following a similar approach to that of Petit et al. (2014), utilizing the methodology established by Polissar et al. (1998). The final uncertainty of jth measurement of species i is given by:

(4)

Where ui is the relative uncertainty for species i and Cj is the concentration in the jth row of the input matrix. For BC, a relative uncertainty of 30% was assigned, incorporating an extended uncertainty to account for the 20% error associated with BC concentrations due to the Weingartner correction. Additionally, to address variability in error distribution across the two instruments, an extra 10% modelling uncertainty was incorporated into the EPA PMF module. This modelling uncertainty was found to help reduce the rotational sensitivity of the solution without affecting the Q/Qexp​ ratio. Following the recommendations of Petit et al. (2014), a sensitivity analysis was conducted on the relative uncertainties associated with BC concentrations. Each uncertainty component (30%) independently varied from 30% to 60% in increments of 10%, and its impact on Q/Qexp​ was assessed. Consistent with the findings of Petit et al. (2014). The solution remained stable despite increasing uncertainty values, with changes in Q/Qexp remaining within 2% and exhibiting no discernible increase or decreasing trend. This suggests that the solution is primarily governed by elemental tracers rather than BC.

***S2.3Factor Selection and Uncertainty Assessment***

**S2.3.1 Selection of Optimal Factor Solution**

Determining the optimal number of factors is a critical, user-dependent step in any PMF-based source apportionment study. PMF operates by minimizing the weighted residual error in the linear decomposition of a multivariate system, often yielding multiple mathematically viable solutions with similar residual structures. Consequently, mathematical diagnostics alone are insufficient for determining the appropriate number of factors (Canonaco et al., 2013; Manchanda et al., 2021; Rai et al., 2020b). Therefore, in addition to standard diagnostics such as the total Q-value, Q/Qexp (Canonaco et al., 2013), and scaled residuals for individual species, the physical interpretability of each resolved factor was evaluated. This was achieved by assessing factor time series correlations with external tracers, analyzing their diurnal patterns, and comparing their elemental compositions with the literature reported in previous studies. In the preliminary base runs, the solution space was explored by varying the number of factors between 2 and 10, employing 10 distinct seeds (i.e., PMF runs initiated with different pseudorandom starting points). To refine the selection of the most appropriate factorization, the process was repeated using 20 seeds for each factor in the vicinity of the likely optimal solution, identified as the point where the Q-value stabilized without significant reduction upon increasing the number of factors. This approach aligns with methodologies used in prior studies to ensure reproducibility (Bhandari et al., 2020). The analysis demonstrated that all solutions within the optimal range exhibited high reproducibility across 20 seed runs, with the minimum Q-value varying by less than 1%. After Q/Qexp analysis and feasibility assessment of the obtained source profiles, a six-factor solution was determined to be optimal.

***S2.3.2 Displacement (DISP) Analysis***

To further assess the robustness of the selected solution, rotational ambiguity was evaluated using the DISP analysis available in the EPA PMF 5.0 module. DISP quantifies the degree to which factor profiles can be perturbed while maintaining an acceptable Q-value variation. In this procedure, individual species concentrations in the factor profiles from the base run are incrementally perturbed, one at a time, and a new PMF run is conducted to achieve a converged solution. An acceptable solution is defined by a Q-value change below a predefined threshold (ΔQmax = 4, 8, 15, 25).

During this process, factor identity shifts, where a perturbed factor aligns more closely with a different base factor rather than itself, are identified as factor swaps. The EPA PMF module detects such swaps using uncentered cross-correlations between the perturbed and base solutions. In this study, no factor swaps were observed, confirming the stability of the PMF solutions. The largest reduction in Q-value for the coupled PMF solution was 0.0738, corresponding to a %ΔQ of 0.0018%, well within the 1% threshold recommended for a reliable DISP solution (Norris et al., 2014). A summary of the DISP results is provided in Table S2.

***S2.3.3 Rotational Uncertainty and FPeak Variation***

PMF is a multivariate factor analysis tool, and an infinite number of mathematically feasible solutions can exist due to its non-orthogonal nature. Unlike methods that enforce orthogonality, PMF allows factors to be correlated, introducing rotational ambiguity in the resolved profiles. To assess this ambiguity, the EPA PMF 5.0 software provides an Fpeak rotation technique, which systematically perturbs factor profiles to explore possible rotations while maintaining a stable Q-value. To further assess rotational uncertainty, the optimal base run was subjected to Fpeak variation from -1 to +1 in increments of 0.1, following established methodologies (Faisal et al., 2025; Manchanda et al., 2021; Rai et al., 2020a; Ulbrich et al., 2009). The range of f-peak rotations was constrained to ensure that the rotated solutions remained within the same solution space (i.e., exhibiting comparable total Q-values) unless rotational ambiguity was present. For BC source apportionment, no significant changes in factor source profiles or external correlations were observed across the f-peak variations. Consequently, the base solution was selected as the optimal solution. The final rotated solution was chosen based on its highest correlation with reference mass spectra and minimal mutual correlation among resolved factors, ensuring robustness and interpretability (Bhandari et al., 2020; Rai et al., 2020a). As detailed in Section S2.2, an additional modelling uncertainty was introduced to account for potential discrepancies arising from differences in the error structures of the three instruments used in this study (Petit et al., 2014). The modelling uncertainty was systematically varied from 0% to 20% in increments of 5%, and its influence on the sensitivity of the solution to f-peak rotations was evaluated. Results indicated that incorporating modeling uncertainty effectively reduced the sensitivity to f-peak variations. Specifically, the percentage change in Q (%Q) for f=+0.1 decreased from 0.25% at 0% modeling uncertainty to 0.13% at 5% and further to 0.097% at 10%. However, beyond 10%, additional increases in modeling uncertainty had a negligible impact on rotational sensitivity. Therefore, a 10% modeling uncertainty was identified as optimal for ensuring solution stability (Ulbrich et al., 2009).

***S2.3.4 Bootstrap (BS) Analysis***

The effect of random errors was evaluated using the bootstrap (BS) randomized resampling strategy (Brown et al., 2015a; Efron, 1979). The bootstrap is implemented in US EPA PMF 5.0 by randomly selecting non-overlapping blocks of species measurements from the input dataset and creating a new PMF input matrix with the total number of samples equal to the original input matrix, where the user specifies the block size. The PMF code then runs over the new input matrix, and the BS factors are mapped to the primary factors. The BS factors are assigned to corresponding base factors with which they have the highest uncentered correlation values (above a user-specified threshold). If a particular BS factor does not have an uncentered correlation higher than the threshold with any base factor, it is considered "unmapped." This analysis provides a proxy to understand the uncertainty associated with the solution and the apportionment of each species in the resolved factors. In this study, the solutions deemed optimal following the prescreening based on Q/Qexp and further evaluation based on Fpeak rotations and DISP analysis were subjected to 800 BS runs each, with a threshold correlation of 0.8 (Table S1). In the current study, 795 BS runs were classified as good solutions, with no unmapped factors (Brown et al., 2015b; Norris et al., 2014). This high success rate further confirms the robustness and reliability of the selected six-factor solution.

Table 1: Summary Table of Bootstrap result

| Number of bootstraps runs: | | | 800 | | | | |
| --- | --- | --- | --- | --- | --- | --- | --- |
| Bootstrap random seed: | | | 47 | | | | |
| Min. Correlation R-Value: | | | 0.8 | | | | |
| Mapping of bootstrap factors to base factors: | | | | | | | |
|  | Factor 1 | Factor 2 | Factor 3 | Factor 4 | Factor 5 | Factor 6 | Unmapped |
| Factor 1 | 795 | 0 | 5 | 0 | 0 | 0 | 0 |
| Factor 2 | 0 | 800 | 0 | 0 | 0 | 0 | 0 |
| Factor 3 | 0 | 0 | 800 | 0 | 0 | 0 | 0 |
| Factor 4 |  | 0 | 0 | 800 | 0 | 0 | 0 |
| Factor 5 | 0 | 0 | 0 | 0 | 798 | 2 | 0 |
| Factor 6 | 0 | 0 | 0 | 0 | 0 | 800 | 0 |

Table 2: summary table of Displacement (DISP) result

| DISP Diagnostics: |  |  |  |  |  |  |
| --- | --- | --- | --- | --- | --- | --- |
| Error Code: | 0 |  |  |  |  |  |
| Largest Decrease in Q: | 0.0738 |  |  |  |  |  |
| %dQ: | 0.0018 |  |  |  |  |  |
| Swaps by Factor: | 0 | 0 | 0 | 0 | 0 | 0 |

Table 3: Regression diagnostics for the Punjab campaign data

|  |  |  |  |  |  |  |
| --- | --- | --- | --- | --- | --- | --- |
| Regression diagnostics: |  |  |  |  |  |  |
|  |  |  |  |  | KS Test | KS Test |
| Species | Intercept | Slope | SE | r^2 | Stat | P Value |
| Si 14 (ng/m3) | 128.164076 | 0.471209514 | 121.3256602 | 0.89108 | 0.109736 | 2.87E-05 |
| S 16 (ng/m3) | 309.4286351 | 0.911983496 | 362.4101001 | 0.96273 | 0.050286 | 0.192186 |
| Cl 17 (ng/m3) | 164.9209065 | 0.938318068 | 428.3928097 | 0.971701 | 0.039343 | 0.470548 |
| K 19 (ng/m3) | 212.6382374 | 0.925365379 | 394.3759821 | 0.979983 | 0.031879 | 0.734476 |
| Ca 20 (ng/m3) | 57.41967588 | 0.69085081 | 70.4514882 | 0.847238 | 0.153457 | 6.77E-10 |
| Ti 22 (ng/m3) | -3.403874461 | 1.052982736 | 13.79996052 | 0.957416 | 0.037625 | 0.528625 |
| V 23 (ng/m3) | -0.1042503 | 0.90084639 | 2.376259315 | 0.956823 | 0.114131 | 1.16E-05 |
| Cr 24 (ng/m3) | 1.271490145 | 0.235324495 | 1.16049718 | 0.454896 | 0.155129 | 4.2E-10 |
| Mn 25 (ng/m3) | 3.584608893 | 0.819972225 | 7.758589069 | 0.863069 | 0.09175 | 0.000823 |
| Fe 26 (ng/m3) | 13.40539587 | 0.954898813 | 39.49373836 | 0.9608 | 0.124484 | 1.17E-06 |
| Cu 29 (ng/m3) | 2.220604502 | 0.754239046 | 5.750578043 | 0.755779 | 0.078149 | 0.006998 |
| Zn 30 (ng/m3) | 62.25555655 | 0.928057971 | 144.893566 | 0.99055 | 0.213754 | 0 |
| As 33 (ng/m3) | 0.698179024 | 0.862456729 | 3.817658465 | 0.602455 | 0.064042 | 0.044835 |
| Se 34 (ng/m3) | 2.602661856 | 0.408320809 | 2.986154929 | 0.567989 | 0.084685 | 0.002612 |
| Br 35 (ng/m3) | 6.677594555 | 0.845620195 | 11.44501461 | 0.87083 | 0.068551 | 0.025774 |
| Sr 38 (ng/m3) | 0.276261086 | 0.928608133 | 3.365139246 | 0.994035 | 0.044772 | 0.31135 |
| Pb 82 (ng/m3) | 2.599437797 | 0.978681513 | 10.52793493 | 0.997543 | 0.154618 | 4.86E-10 |
| BC | -455.1525654 | 0.98900768 | 2646.966764 | 0.880316 | 0.060015 | 0.071209 |


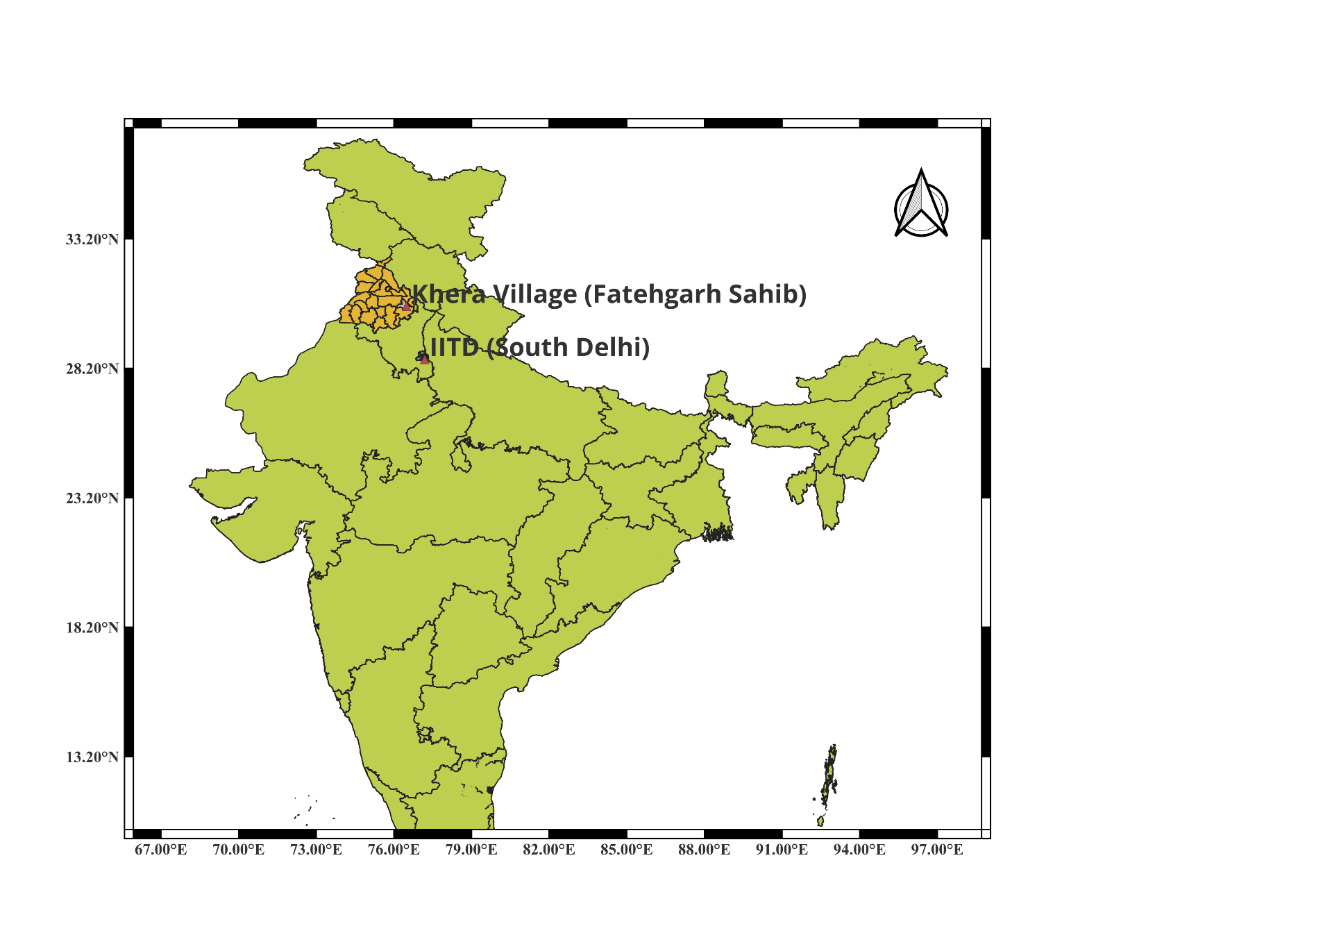


Figure S1: Sampling Site Locations of Khera Village in the Fatehgarh Sahib district of Punjab. Khera Village, situated northwest (NW) of Delhi, served as a measurement site for characterizing emissions from crop residue (stubble) burning. Real-time air quality measurements were conducted during the post-monsoon period of 2023 using a mobile laboratory equipped with advanced instrumentation, positioned in proximity to active stubble-burning fields.

**S3 Result and discussion**

Positive Matrix Factorization (PMF) was employed to analyse the input dataset, yielding the identification of six distinct source profiles. Three of these factors were comprehensively discussed in the main manuscript. The remaining three factors, specifically the dust-related factor, Pb-rich factor, and waste incineration factor, are further explained below.

***3.1 Dust related***

*The dust factor shown in Figure 6e is responsible for 60% of total Si, 93% of total Ca, 23% of total Ti, 21% of total Fe, 62.5% of total Cr, and 4% of total S. Its mass fractional composition is primarily dominated by Si, Ca, Fe, S, and K, which are well-established tracers of crustal dust and soil* (Rai et al., 2020c; Sharma et al., 2016)*. This composition aligns with the upper continental crustal profile, reported by* Rai et al. (2020)*. The presence of S within this factor suggests a potential influence from construction activities, particularly gypsum (CaSO₄) emissions. Additionally, the co-occurrence of Si and Ca indicates contributions from various construction-related dust sources, including silt and gravel* (Bernardoni et al., 2011)*. Consequently, this factor likely encompasses both natural mineral dust and anthropogenic sources such as road dust resuspension, construction, demolition activities, and material weathering and erosive processes from built environments. Further supporting this interpretation, the diurnal variation of this factor exhibits a pronounced evening peak (Fig. S5), indicative of dust resuspension driven by vehicular movement, road dust resuspension, and ongoing construction activities, coupled with boundary layer dynamics. This factor accounts for approximately 4% of the total elemental and black carbon fraction of PM₂.₅, as illustrated in Figure S4.*

***3.2 Pb-rich factor***

*The lead-rich factor is dominated by high contributions of BC, S, Cl, Pb, and Zn, accounting for 43%, 26%, 9%, 6. 5%, and 5% of the total factor mass, respectively (Figure (6f)). In terms of species distribution across factors, this factor is responsible for 73% of Pb, 12% of S, 14% of Mn, 14% of Cu, 8% of Zn, 7% of As, and 6% of BC. The contribution of this lead-rich factor to the elemental and BC fraction of PM₂.₅ was estimated at 7% during the study period. High abundance lead factor was identified as coal combustion (Manchanda et al., 2021)*

*As and zinc Zn have been widely recognized as tracers of coal combustion* (Gupta et al., 2007; Hien et al., 2001; Manchanda et al., 2021)*. Zn, in particular, has been used as an indicator of coal combustion in India due to the relatively higher Zn content in Indian coals* (Almeida et al., 2006)*. Although commercially available coal generally has low Pb content,* (Negi et al., 1987) *reported elevated Pb and Zn concentrations in domestic soft coal. Previous studies identified BC emissions associated with this factor* (Kumar et al., 2024)*. Indian domestic coals typically contain low sulfur levels (below 0.6% by mass), except for coal deposits in northeastern India, which exhibit higher sulfur content* (Sarkar, 2009)*. Furthermore, Indian power plants have been reported to use blended domestic and imported coals, contributing to increased sulfate emissions from power generation facilities* (Central Electricity Authority, 2012; Manchanda et al., 2021)*. In a previous study, Prakash et al. (2018) examined the origins of Cu and Pb emissions in Delhi, particularly from industrial metal processing and lead-acid battery manufacturing and recycling facilities. Diurnal variation of this factor exhibits a distinct peak during the morning hours, followed by a gradual decline and subsequent stabilization throughout the day. The pronounced morning peak suggests enhanced emissions during the early hours, likely linked to combustion activities such as industrial operations or power plant emissions, which are more prominent at the start of the day (Figure (5d)). The subsequent decrease and stabilization may be attributed to reduced emission rates or the influence of boundary layer dynamics, leading to pollutant dispersion and dilution. The black carbon concentration associated with this lead-rich factor (BCPb−rich) had an average value of 0.7 ± 1.45 µg/m³.*

***3.3 Waste Incineration***

*This factor, depicted in Figure (6d), is primarily dominated by high contributions of Zn (42%), Cl (24%), BC (9.4%), K (7.5%), and Fe (2%). In terms of species distribution across factors, it accounts for 75% of total Zn, 33.4% of total Mn, 13.6% of total As, 12.2% of total Pb, 14% of total Cu, 13% of total Cl, 7.3% of total Fe, 5% of total Br, and 4.5% of total K (Fig. 2(a)). Several studies have previously identified a Zn-dominated factor as indicative of waste incineration sources* (Faisal et al., 2022; Gupta et al., 2012; Kumar et al., 2024; Manchanda et al., 2021)*. These studies primarily associate this factor with the incineration of electronic or municipal waste, where halides facilitate the volatilization of metals, forming metal halogenides. In addition to Zn, other metals reported in the obtained source profile commonly linked to waste incineration include K, As, Fe, and Pb* (Manchanda et al., 2021)*. While chlorine (Cl) is the most prevalent halide, Vehlow et al. (2003) have highlighted that bromine (Br), particularly from plastics containing flame retardants, can also play a significant role in the volatilization of heavy metals such as Zn, Fe, and As.* Duan and Tan, (2013) *identified zinc (Zn) and arsenic (As) as key tracers of emissions from the iron and steel industry, indicating that these elements may originate from multiple anthropogenic sources contributing to their atmospheric presence. The diurnal variation of this factor exhibits a distinct peak during the morning hours, indicating its maximum contribution at this time (Figure 5d). The average BC concentration attributed to this factor (BCWI) was found to be 0.23 ± 0.26 µg/m³.*

*
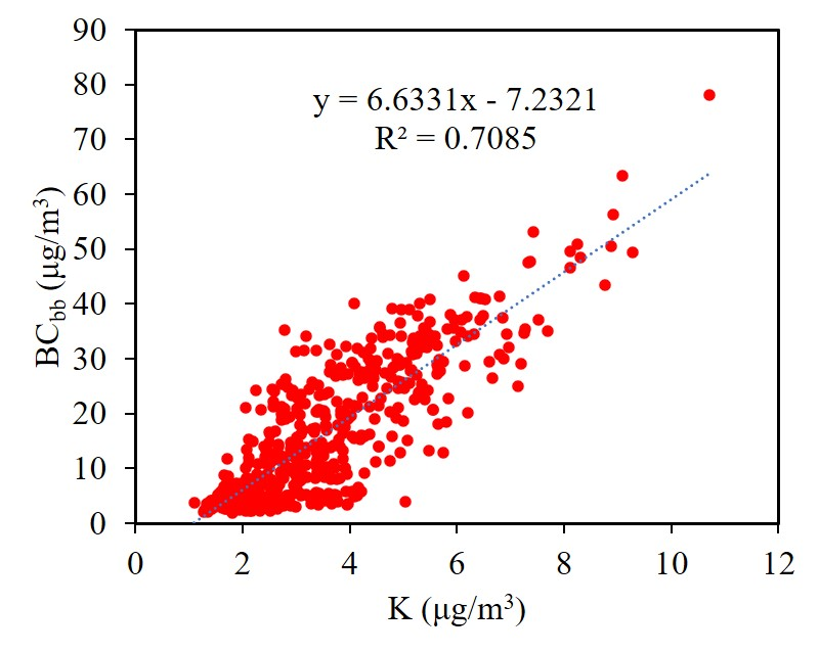
*


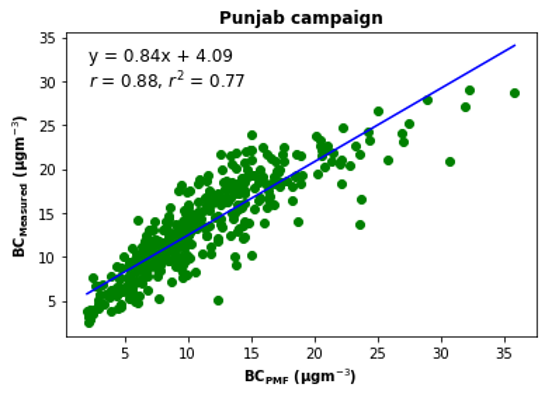
Figure S2: Scatter plot between K and BCbb. The BCbb is apportioned using the aethalometer model and K is measured with Xact.

Figure S3: Scatter plot between BCMeasured and BCreconstructed


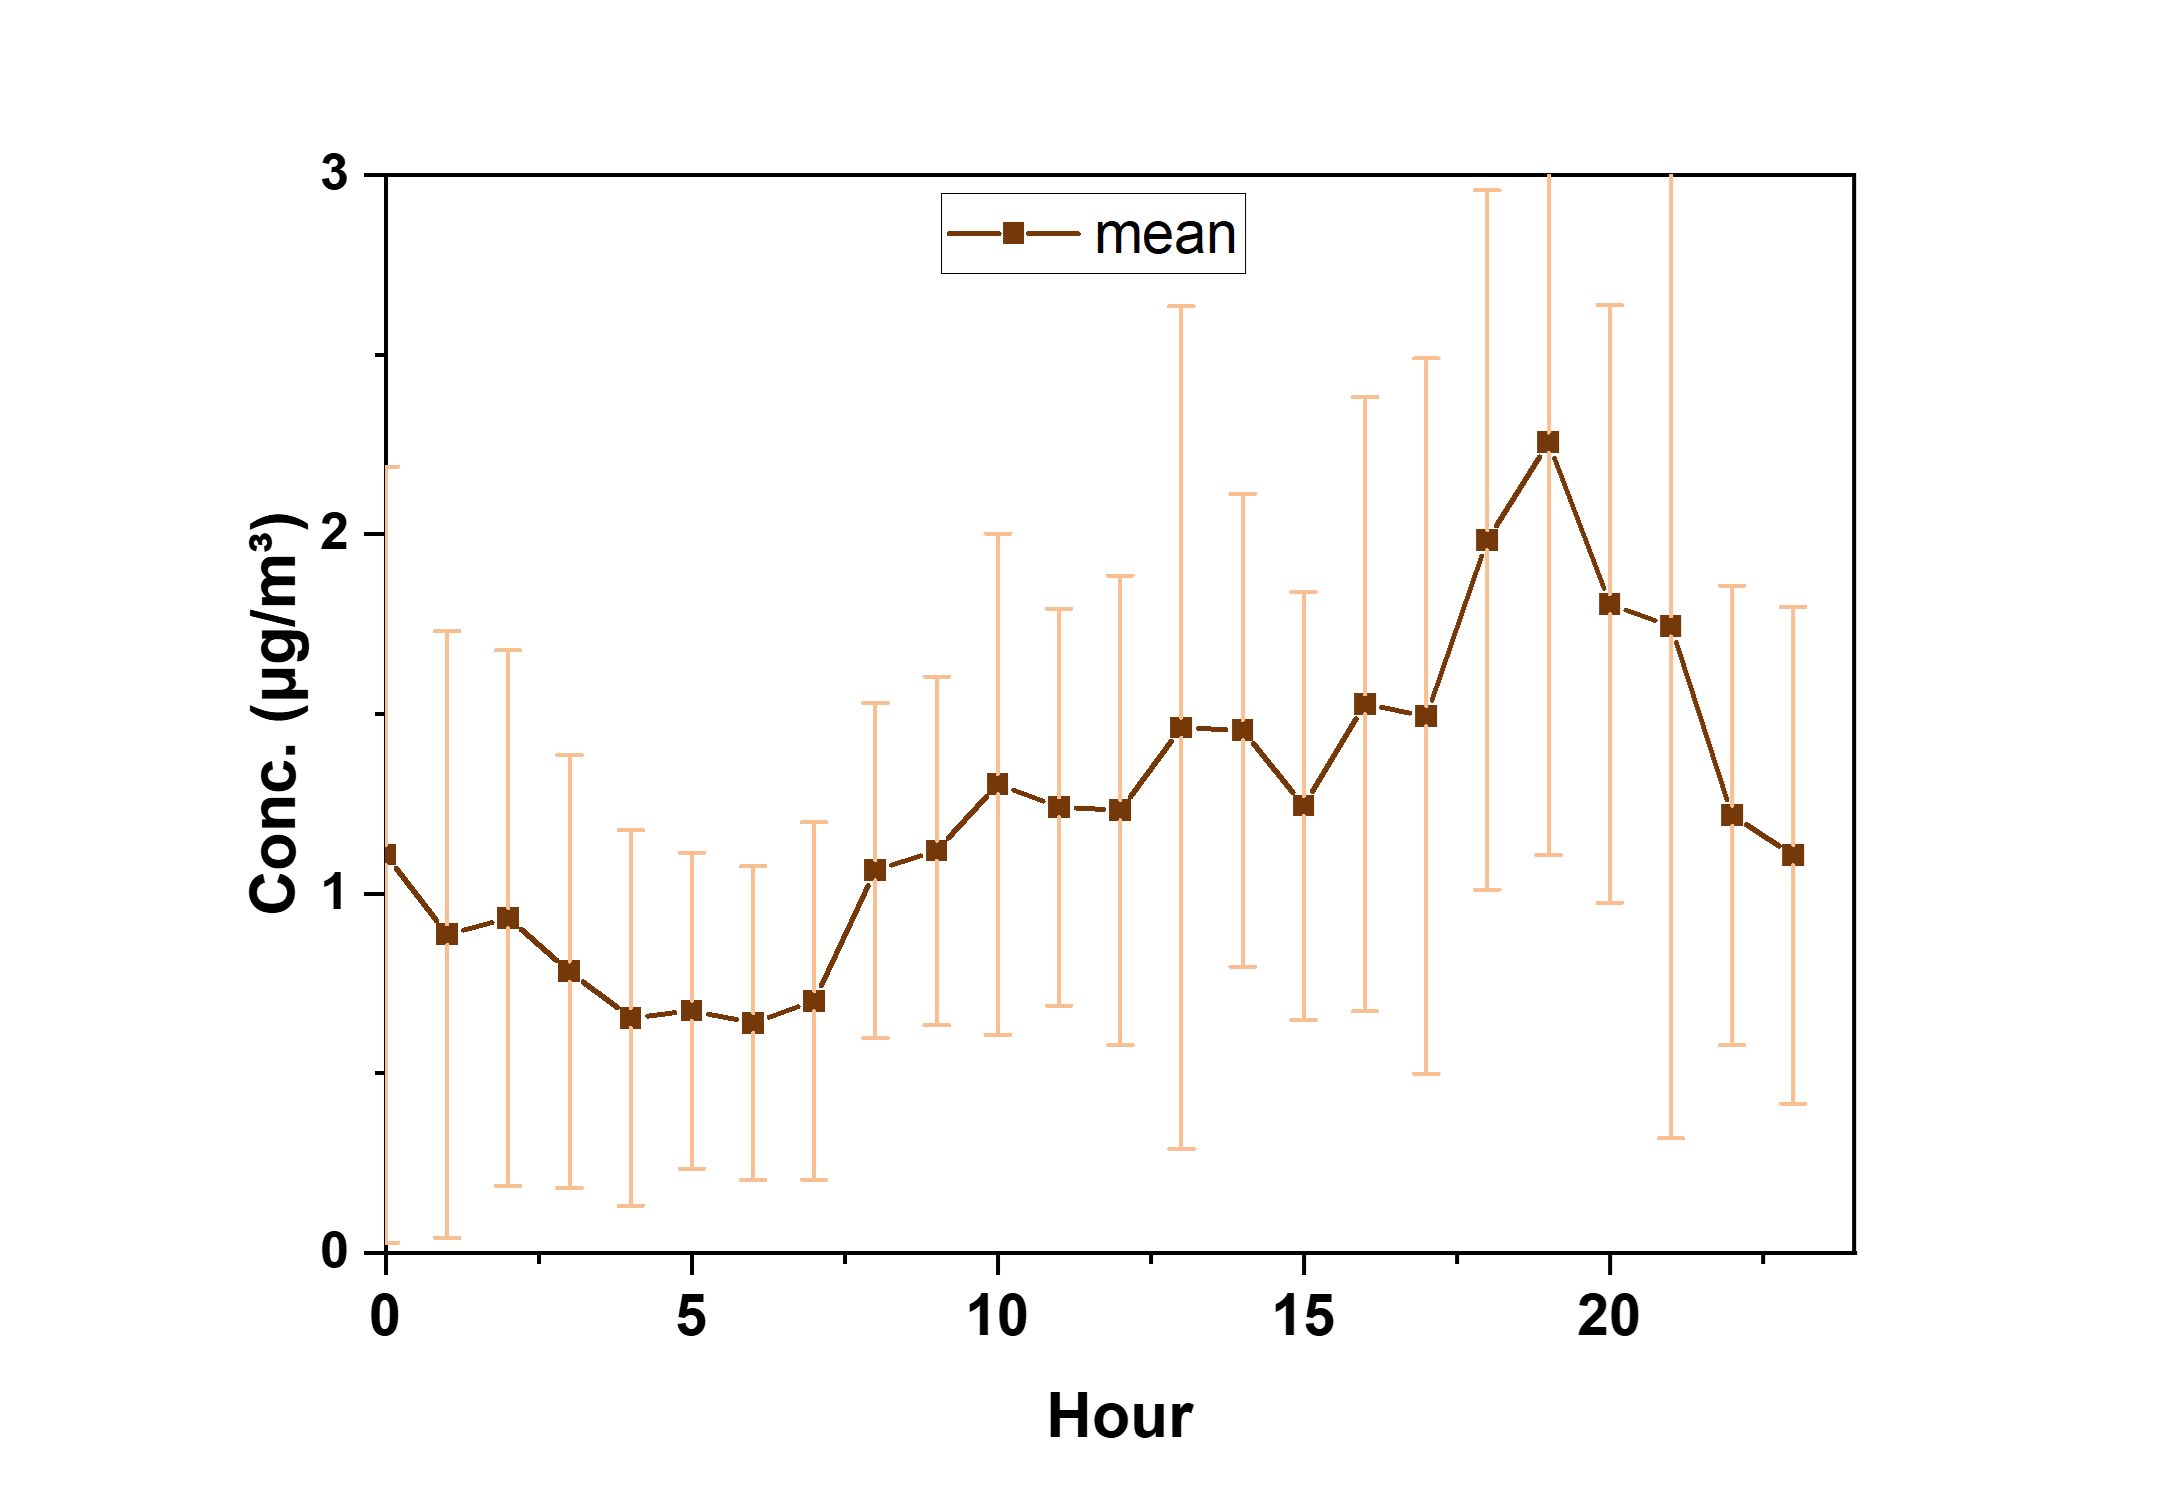
*
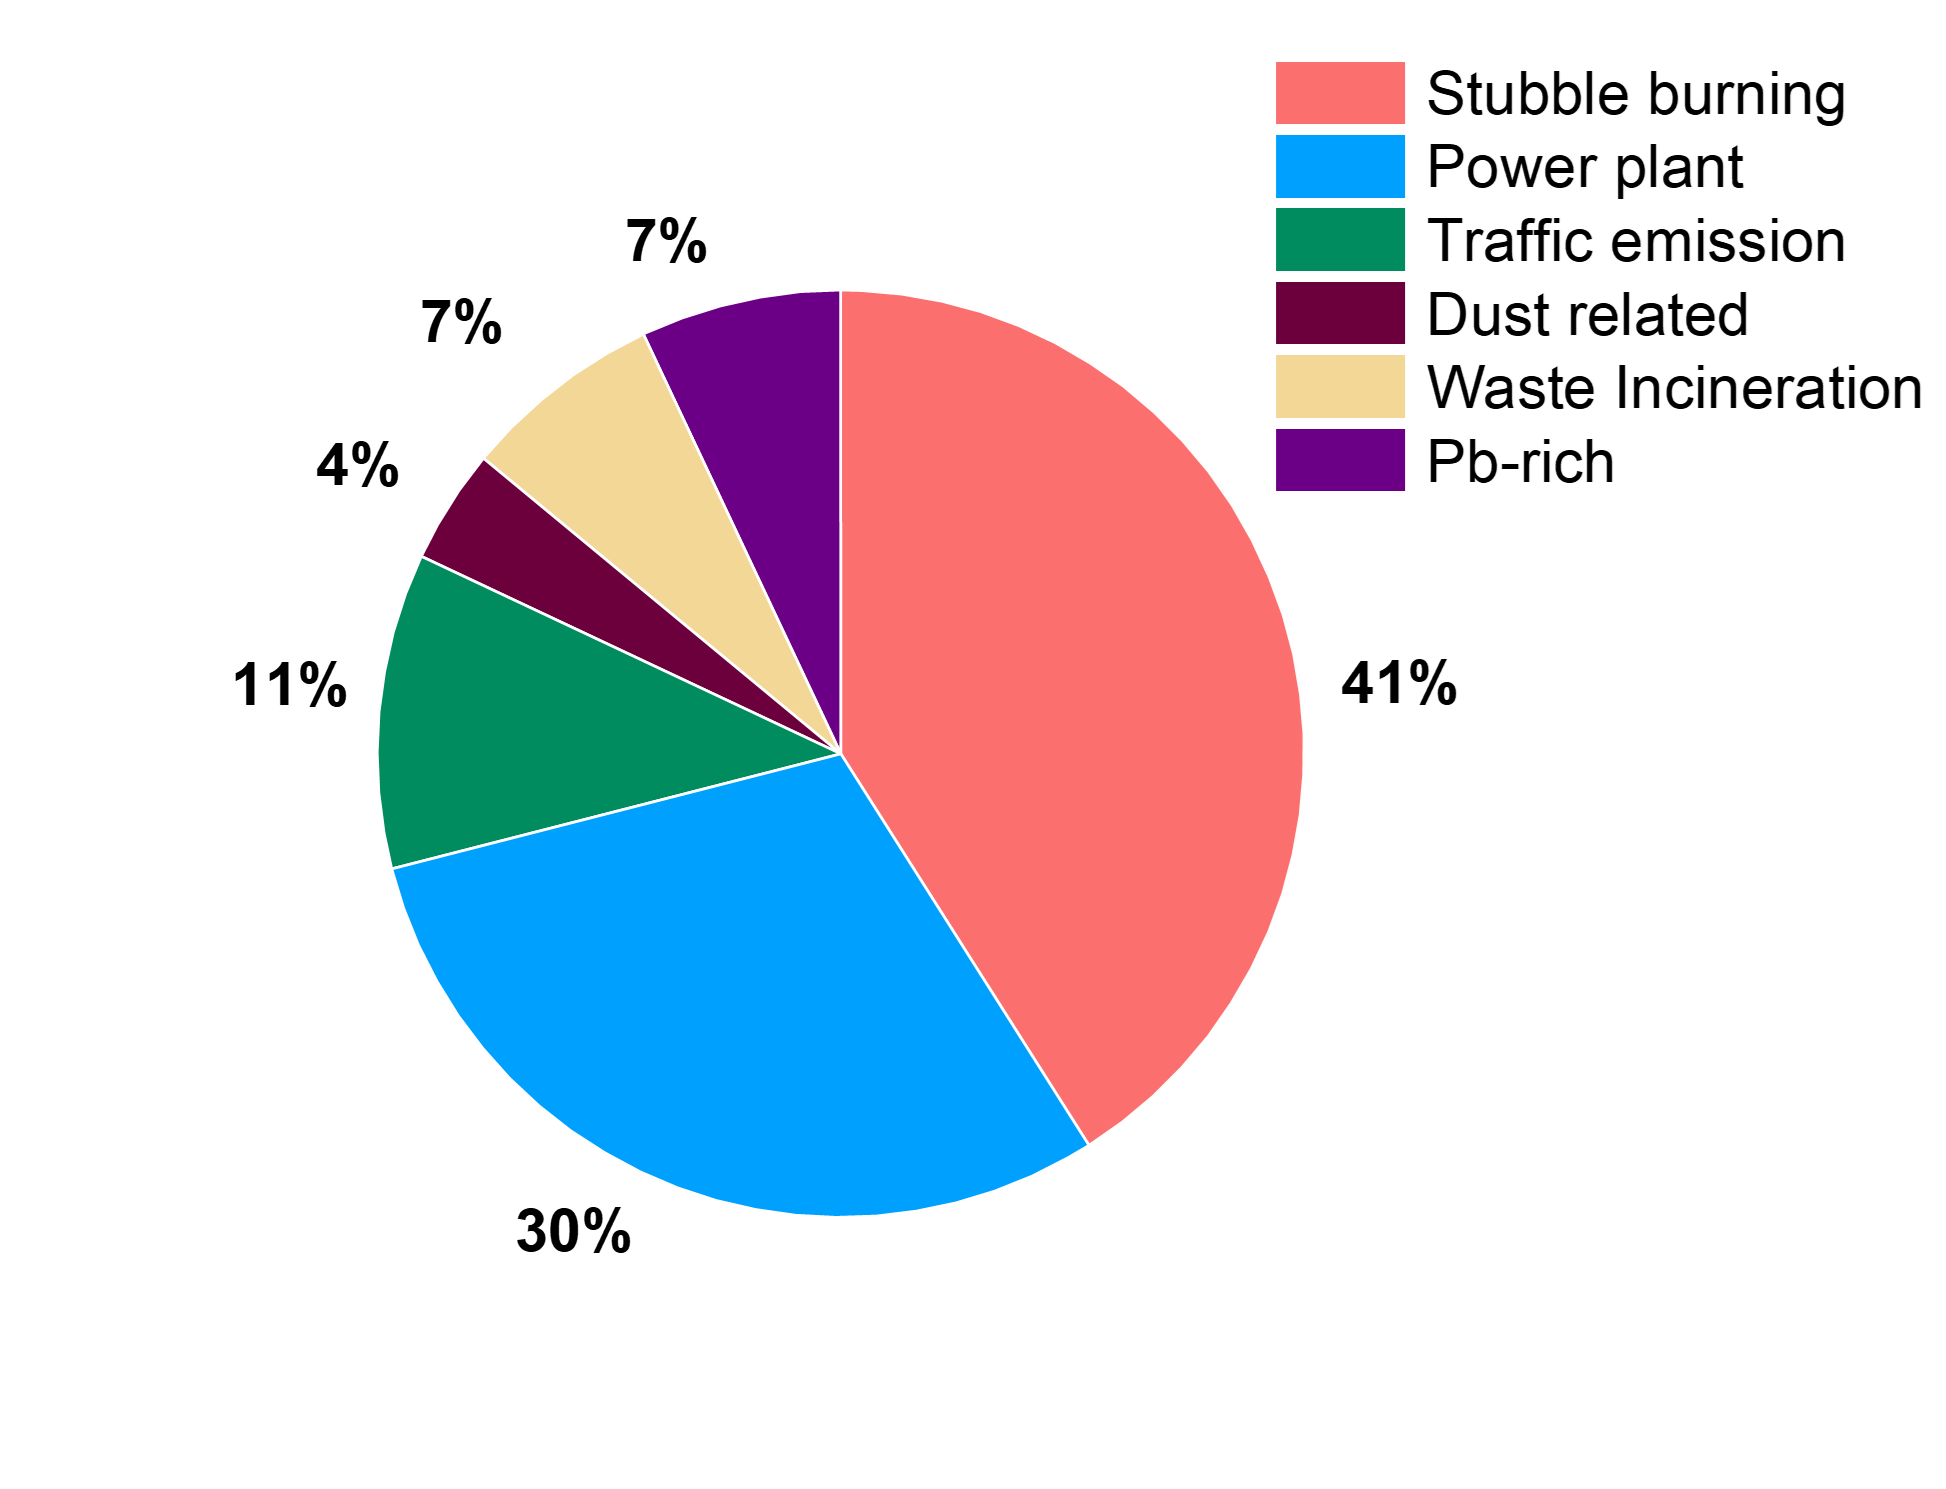
*

Figure S4: Source contribution of different sources to elemental and black carbon (BC) fractions of PM₂.₅ during the Punjab campaign

*Figure S5: Diurnal variation dust-related factor obtained from the PMF model*

***
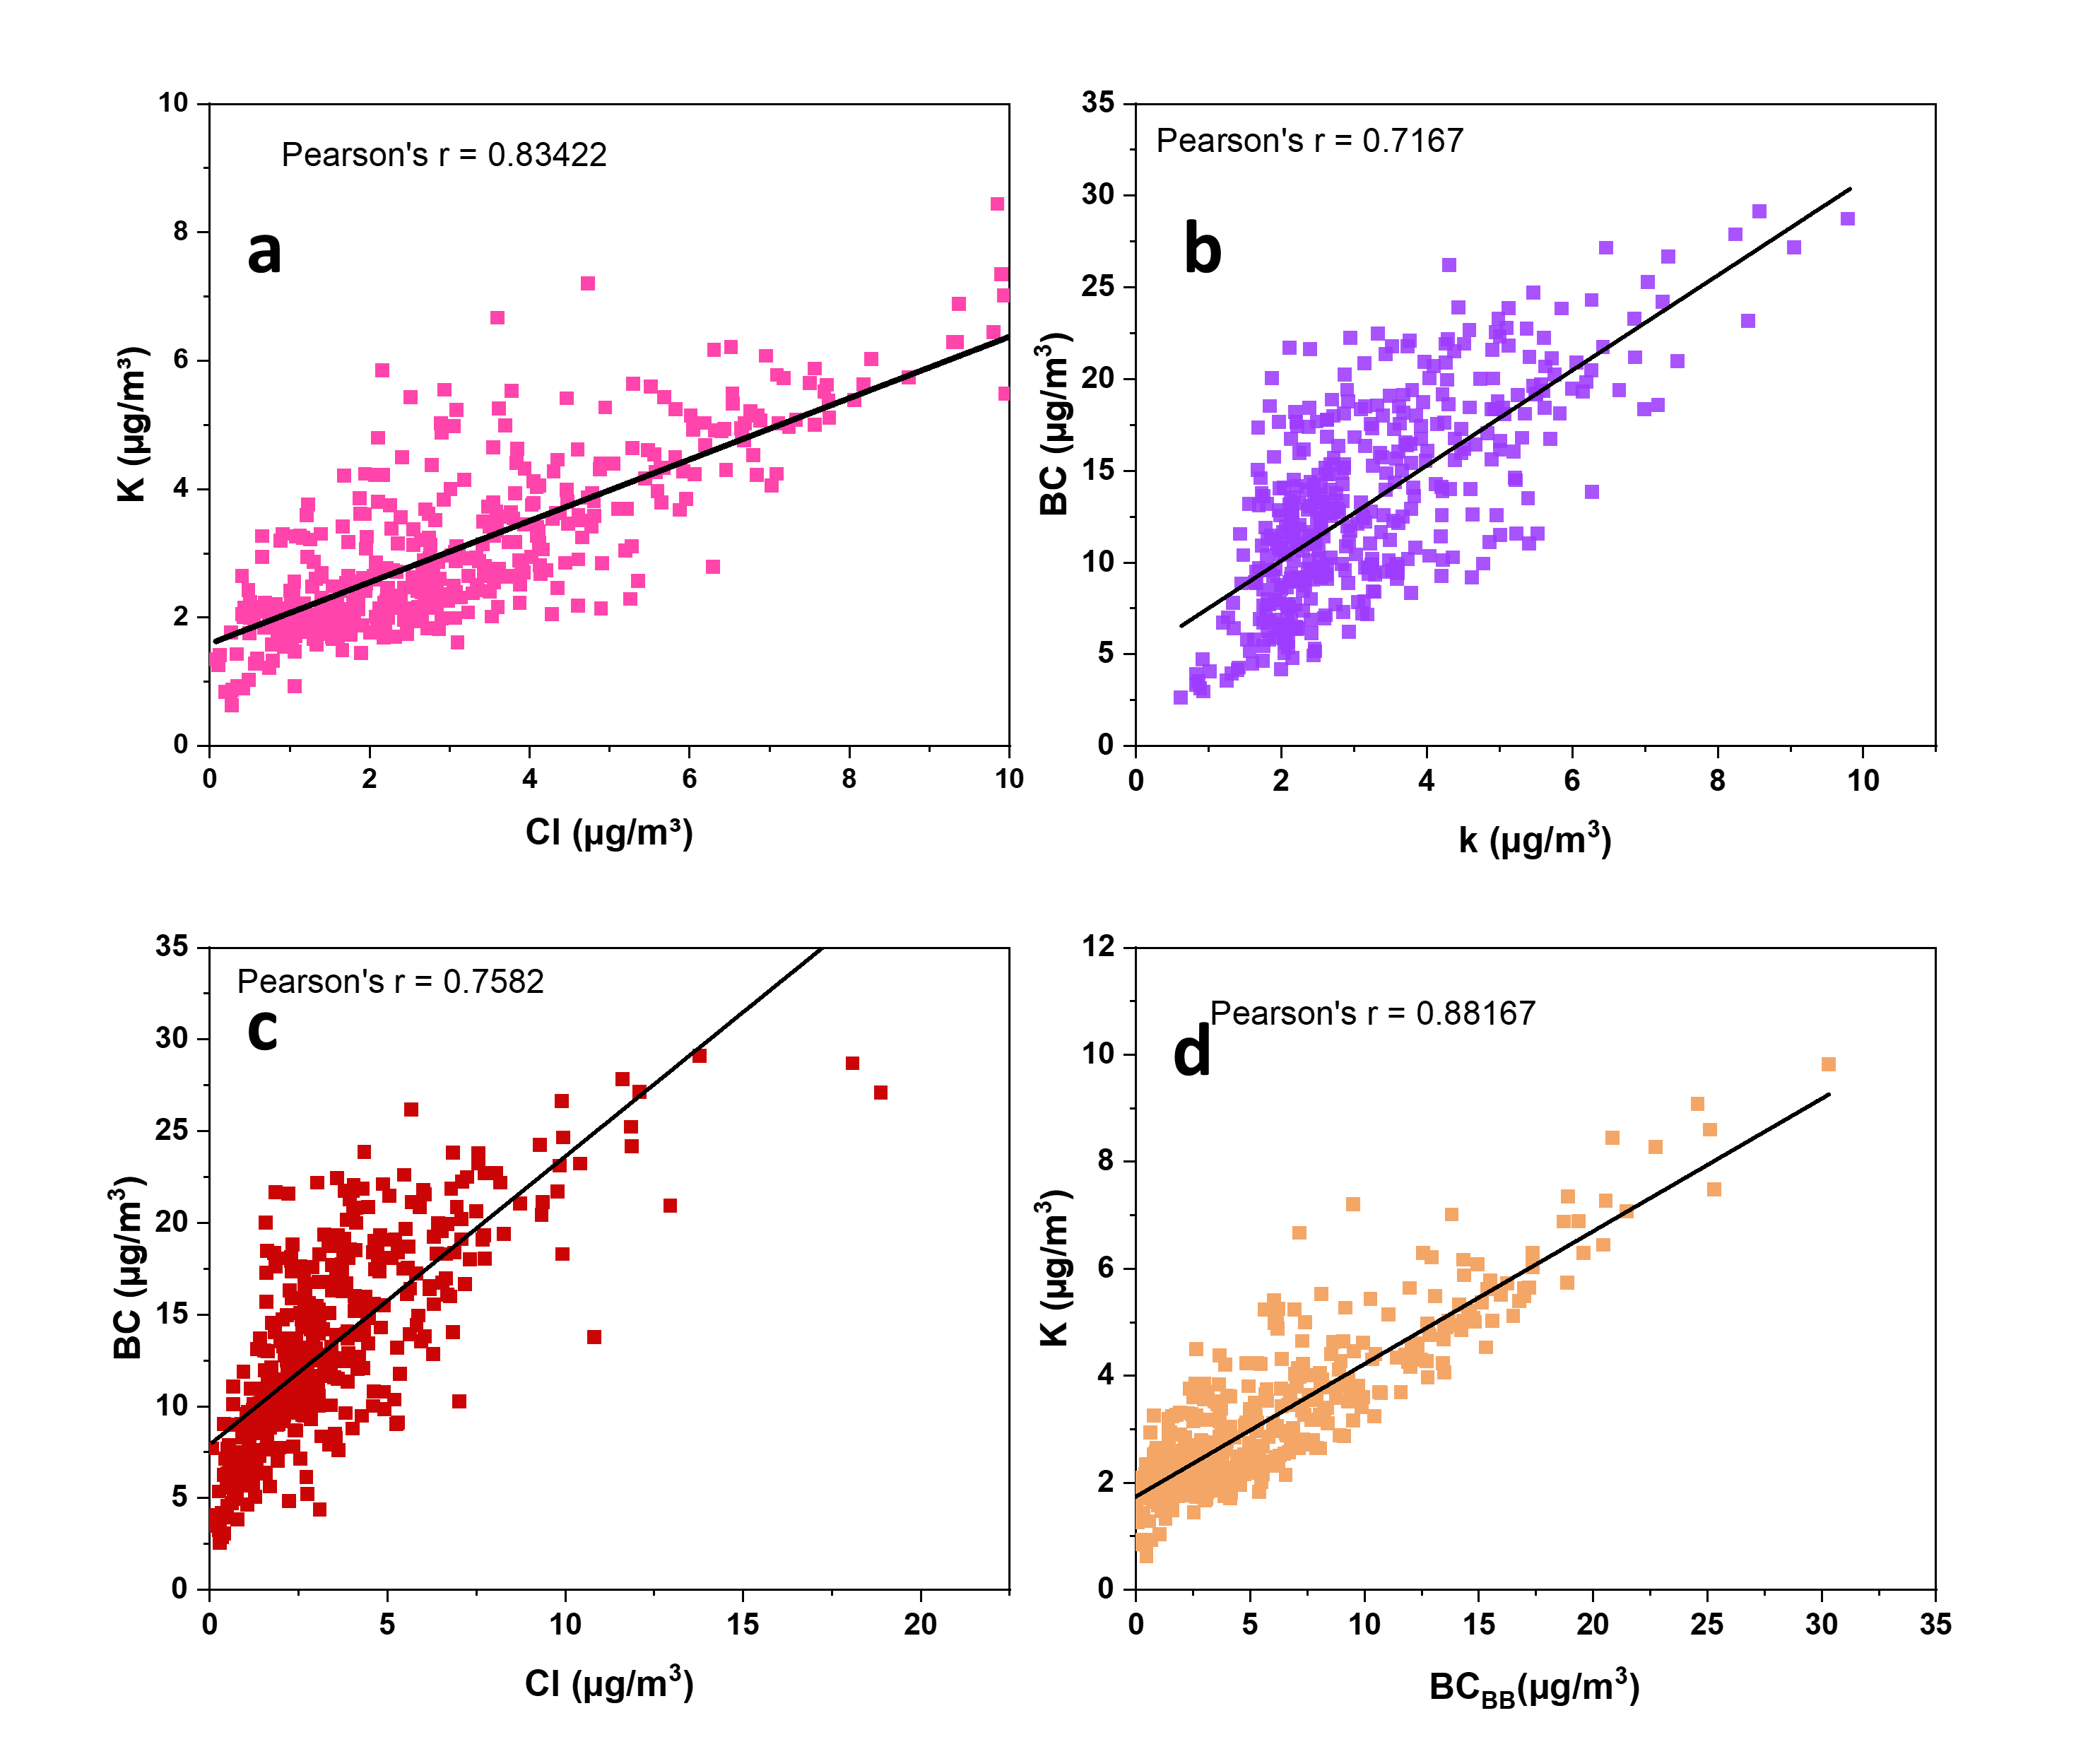
***

Figure S6: Scatter plot between (a) K and Cl, (b) K and BC, (C) Cl and BC, and (d) K and BCBB (derived from PMF model)

***
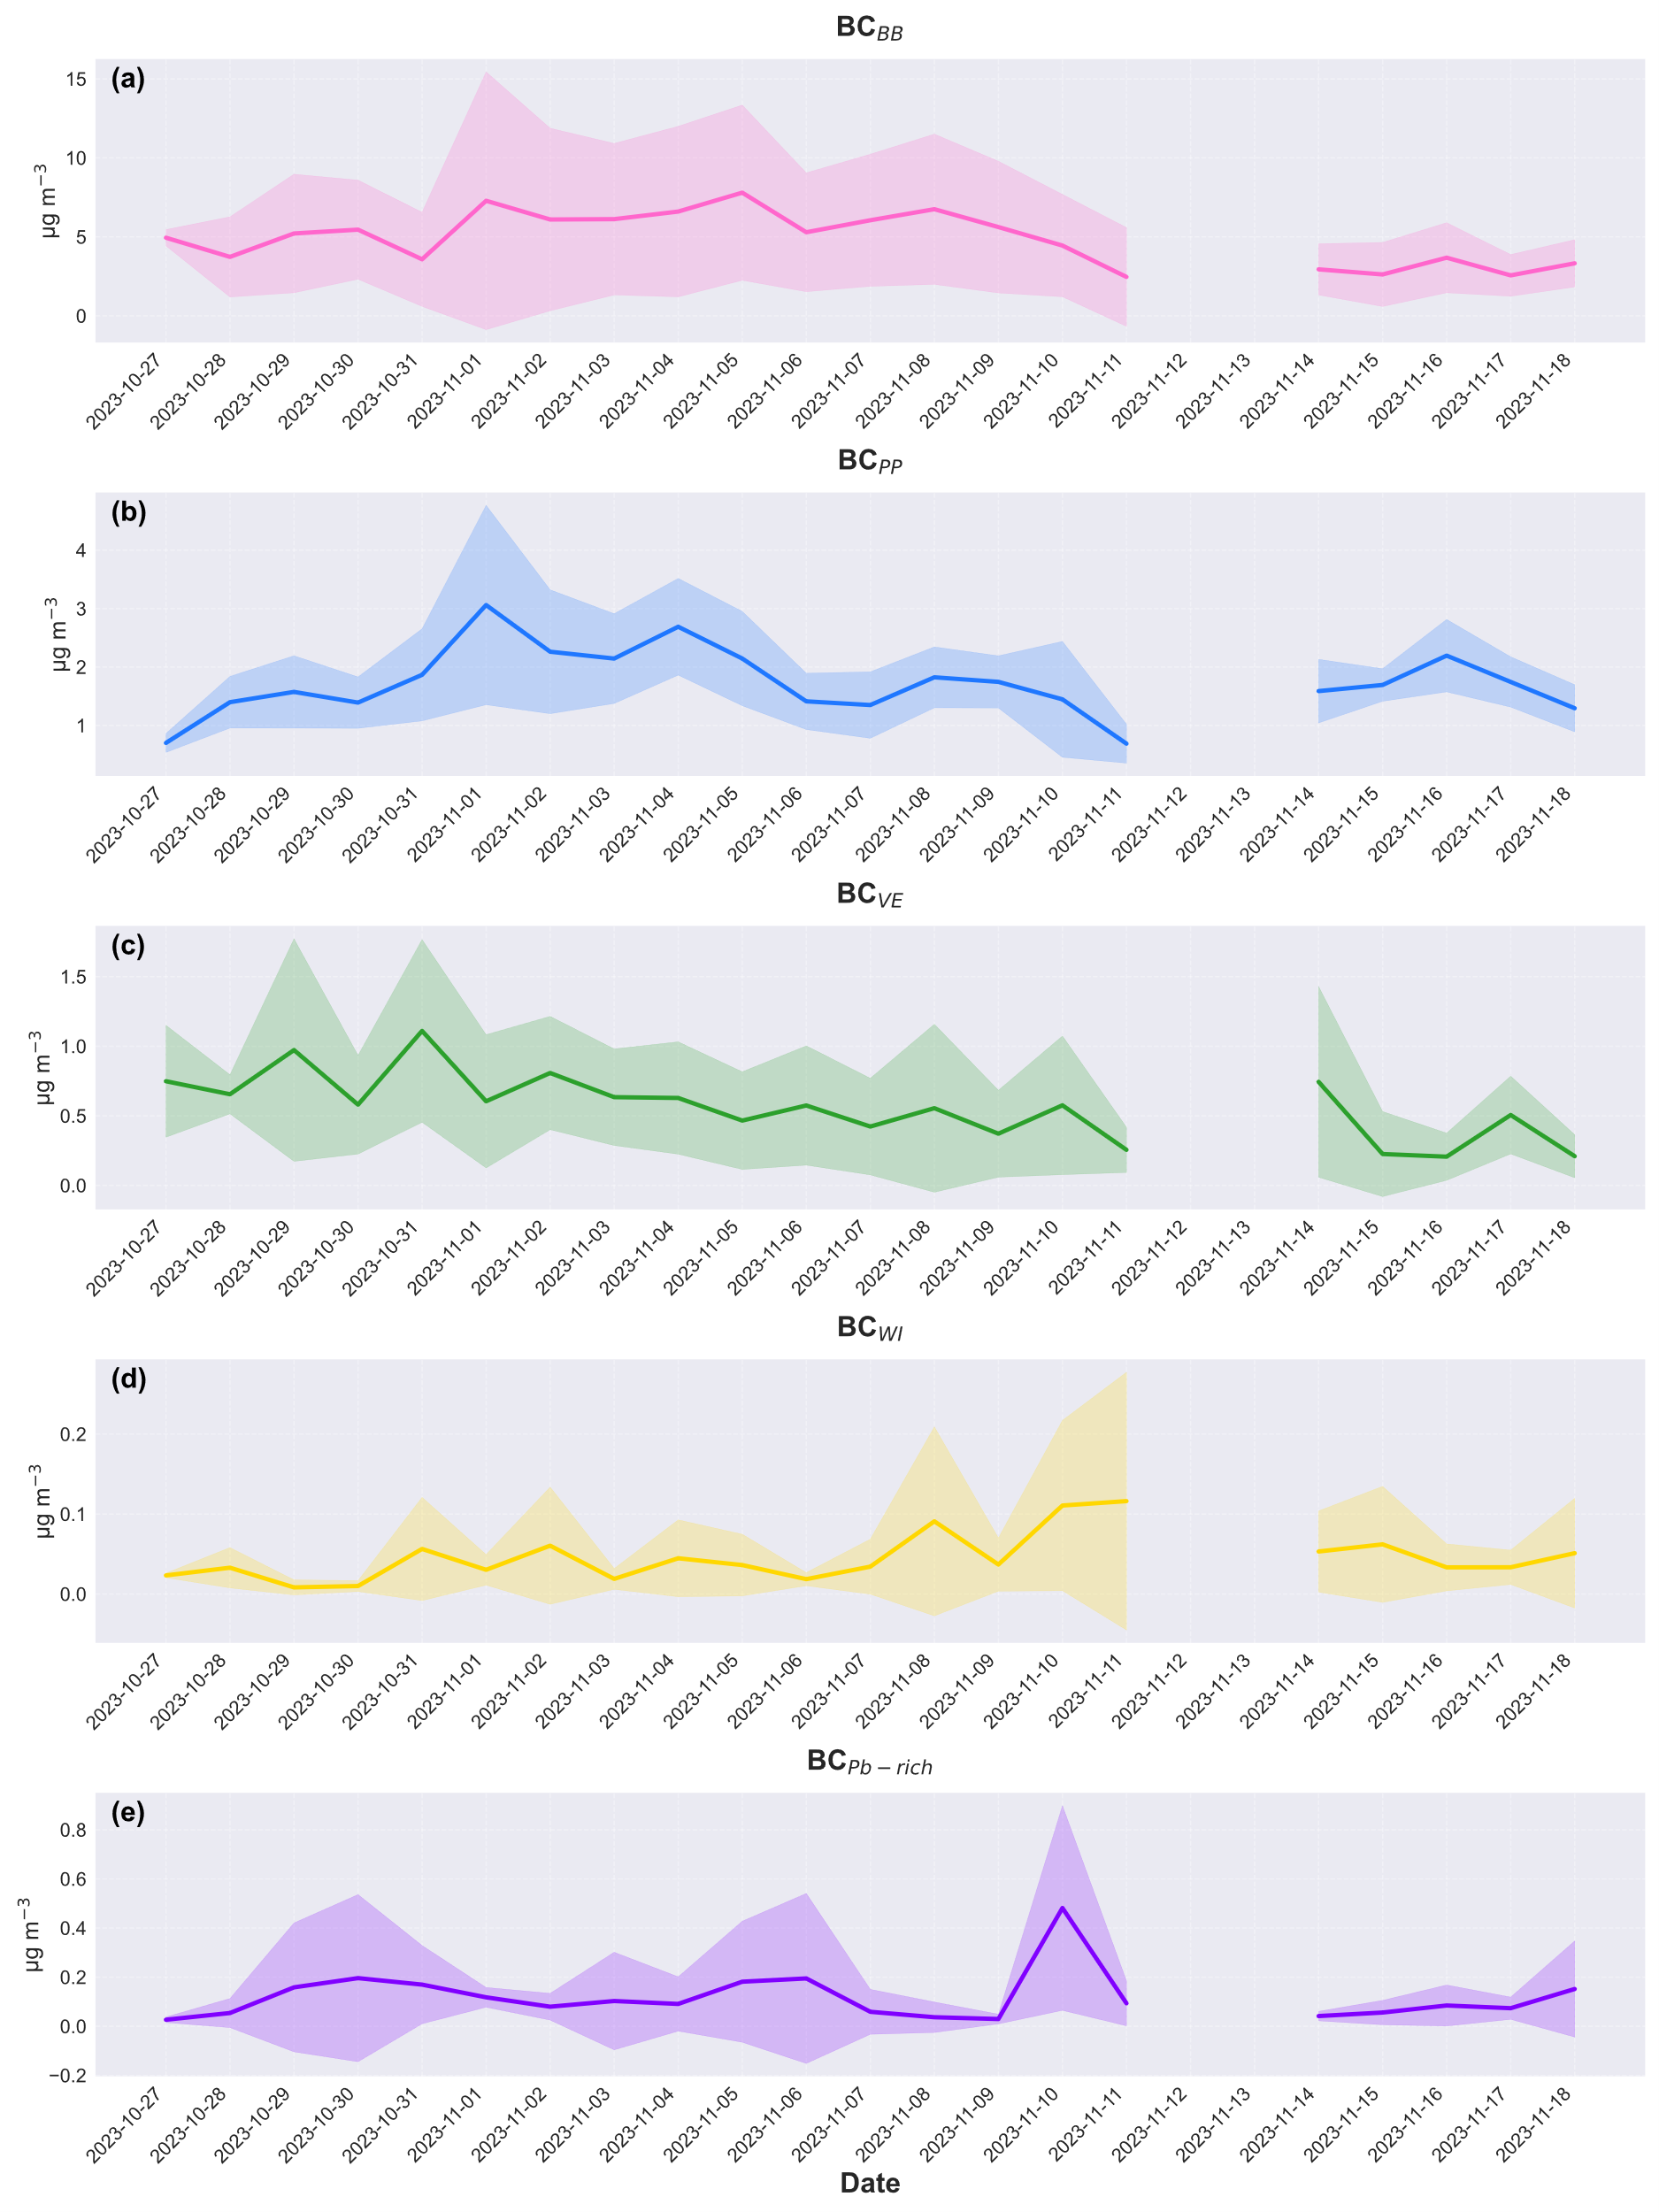
***

Figure 7: Daily average variation of BC factors obtained from the PMF model

***References:***

Almeida, S.M., Pio, C.A., Freitas, M.C., Reis, M.A., Trancoso, M.A., 2006. Source apportionment of atmospheric urban aerosol based on weekdays/weekend variability: Evaluation of road re-suspended dust contribution. Atmos. Environ. 40, 2058–2067. https://doi.org/10.1016/j.atmosenv.2005.11.046

Bernardoni, V., Vecchi, R., Valli, G., Piazzalunga, A., Fermo, P., 2011. PM10 source apportionment in Milan (Italy) using time-resolved data. Sci. Total Environ. 409, 4788–4795. https://doi.org/10.1016/j.scitotenv.2011.07.048

Bhandari, S., Gani, S., Patel, K., Wang, D.S., Soni, P., Arub, Z., Habib, G., Apte, J.S., Hildebrandt Ruiz, L., 2020. Sources and atmospheric dynamics of organic aerosol in New Delhi, India: Insights from receptor modeling. Atmos. Chem. Phys. 20, 735–752. https://doi.org/10.5194/acp-20-735-2020

Brown, S.G., Eberly, S., Paatero, P., Norris, G.A., 2015a. Methods for estimating uncertainty in PMF solutions: Examples with ambient air and water quality data and guidance on reporting PMF results. Sci. Total Environ. 518–519, 626–635. https://doi.org/10.1016/j.scitotenv.2015.01.022

Brown, S.G., Eberly, S., Paatero, P., Norris, G.A., 2015b. Methods for estimating uncertainty in PMF solutions: Examples with ambient air and water quality data and guidance on reporting PMF results. Sci. Total Environ. 518–519, 626–635. https://doi.org/10.1016/j.scitotenv.2015.01.022

Canonaco, F., Crippa, M., Slowik, J.G., Baltensperger, U., Prévôt, A.S.H., 2013. SoFi, an IGOR-based interface for the efficient use of the generalized multilinear engine (ME-2) for the source apportionment: ME-2 application to aerosol mass spectrometer data. Atmos. Meas. Tech. 6, 3649–3661. https://doi.org/10.5194/amt-6-3649-2013

Central Electricity Authority, 2012. Report of the group for studying range of blending of imported coal with domestic coal.

Duan, J., Tan, J., 2013. Atmospheric heavy metals and Arsenic in China: Situation, sources and control policies. Atmos. Environ. https://doi.org/10.1016/j.atmosenv.2013.03.031

Efron, B., 1979. Bootstrap Methods: Another Look at the Jackknife. Ann. Stat. 7, 1–26. https://doi.org/10.1214/aos/1176344552

Faisal, M., Ali, U., Kumar, A., Kumar, M., Singh, V., 2025. Unveiling PM2.5 sources: Double and tracer conjugate PMF approaches for high-resolution organic, BC, and inorganic PM2.5 data. Atmos. Environ. 343, 121011. https://doi.org/10.1016/j.atmosenv.2024.121011

Faisal, M., Hazarika, N., Ganguly, D., Kumar, M., Singh, V., 2022. PM2.5 bound species variation and source characterization in the post-lockdown period of the Covid-19 pandemic in Delhi. Urban Clim. 46, 101290. https://doi.org/10.1016/j.uclim.2022.101290

Gupta, A.K., Karar, K., Srivastava, A., 2007. Chemical mass balance source apportionment of PM10 and TSP in residential and industrial sites of an urban region of Kolkata, India. J. Hazard. Mater. 142, 279–287. https://doi.org/10.1016/j.jhazmat.2006.08.013

Gupta, I., Salunkhe, A., Kumar, R., 2012. Source apportionment of PM10 by positive matrix factorization in urban area of Mumbai, India. Sci. World J. 2012. https://doi.org/10.1100/2012/585791

Hien, P.D., Binh, N.T., Truong, Y., Ngo, N.T., Sieu, L.N., 2001. Comparative receptor modelling study of TSP, PM and PM \ in Ho Chi Minh City, Atmospheric Environment.

Kumar, A., Goel, V., Faisal, M., Ali, U., Maity, R., Ganguly, D., Singh, V., Kumar, M., 2024. Two different approaches for source apportionment of ambient black carbon in highly polluted environments. Atmos. Environ. 338, 120863. https://doi.org/10.1016/j.atmosenv.2024.120863

Manchanda, C., Kumar, M., Singh, V., Faisal, M., Hazarika, N., Shukla, A., Lalchandani, V., Goel, V., Thamban, N., Ganguly, D., Tripathi, S.N., 2021. Variation in chemical composition and sources of PM2.5 during the COVID-19 lockdown in Delhi. Environ. Int. 153, 106541. https://doi.org/10.1016/j.envint.2021.106541

Negi, B.S., Sadasivan, S., Mishra, U.C., 1987. AEROSOL COMPOSITION AND SOURCES IN URBAN AREAS IN INDIA.

Norris, G., Duvall, R., Brown, S., Bai, S., 2014. EPA PMF 5.0 User Guide.

Petit, J.-E., Favez, O., Sciare, J., Canonaco, F., Croteau, P., Močnik, G., Jayne, J., Worsnop, D., Leoz-Garziandia, E., 2014. Submicron aerosol source apportionment of wintertime pollution in Paris, France by double positive matrix factorization (PMF&amp;lt;sup&amp;gt;2&amp;lt;/sup&amp;gt;) using an aerosol chemical speciation monitor (ACSM) and a multi-wavelength Aethalometer. Atmos. Chem. Phys. 14, 13773–13787. https://doi.org/10.5194/acp-14-13773-2014

Petit, J.E., Favez, O., Sciare, J., Canonaco, F., Croteau, P., Močnik, G., Jayne, J., Worsnop, D., Leoz-Garziandia, E., 2014. Submicron aerosol source apportionment of wintertime pollution in Paris, France by double positive matrix factorization (PMF2) using an aerosol chemical speciation monitor (ACSM) and a multi-wavelength Aethalometer. Atmos. Chem. Phys. 14, 13773–13787. https://doi.org/10.5194/acp-14-13773-2014

Polissar, A. V., Hopke, P.K., Paatero, P., Malm, W.C., Sisler, J.F., 1998. Atmospheric aerosol over Alaska 2. Elemental composition and sources. J. Geophys. Res. Atmos. 103, 19045–19057. https://doi.org/10.1029/98JD01212

Rai, P., Furger, M., El Haddad, I., Kumar, V., Wang, L., Singh, A., Dixit, K., Bhattu, D., Petit, J.E., Ganguly, D., Rastogi, N., Baltensperger, U., Tripathi, S.N., Slowik, J.G., Prévôt, A.S.H., 2020a. Real-time measurement and source apportionment of elements in Delhi’s atmosphere. Sci. Total Environ. 742, 140332. https://doi.org/10.1016/j.scitotenv.2020.140332

Rai, P., Furger, M., Slowik, J.G., Canonaco, F., Fröhlich, R., Hüglin, C., Minguillón, M.C., Petterson, K., Baltensperger, U., Prévôt, A.S.H., 2020b. Source apportionment of highly time-resolved elements during a firework episode from a rural freeway site in Switzerland. Atmos. Chem. Phys. 20, 1657–1674. https://doi.org/10.5194/acp-20-1657-2020

Rai, P., Furger, M., Slowik, J.G., Canonaco, F., Fröhlich, R., Hüglin, C., Minguillón, M.C., Petterson, K., Baltensperger, U., Prévôt, A.S.H., 2020c. Source apportionment of highly time-resolved elements during a firework episode from a rural freeway site in Switzerland. Atmos. Chem. Phys. 20, 1657–1674. https://doi.org/10.5194/acp-20-1657-2020

Sarkar, S., 2009. Fuels and Combustion.

Sharma, S.K., Mandal, T.K., Jain, S., Saraswati, Sharma, A., Saxena, M., 2016. Source Apportionment of PM2.5 in Delhi, India Using PMF Model. Bull. Environ. Contam. Toxicol. 97, 286–293. https://doi.org/10.1007/s00128-016-1836-1

Tremper, A.H., Font, A., Priestman, M., Hamad, S.H., Chung, T.C., Pribadi, A., Brown, R.J.C., Goddard, S.L., Grassineau, N., Petterson, K., Kelly, F.J., Green, D.C., 2018. Field and laboratory evaluation of a high time resolution x-ray fluorescence instrument for determining the elemental composition of ambient aerosols. Atmos. Meas. Tech. 11, 3541–3557. https://doi.org/10.5194/amt-11-3541-2018

Ulbrich, I.M., Canagaratna, M.R., Zhang, Q., Worsnop, D.R., Jimenez, J.L., 2009. Interpretation of organic components from Positive Matrix Factorization of aerosol mass spectrometric data. Atmos. Chem. Phys. 9, 2891–2918. https://doi.org/10.5194/acp-9-2891-2009
